# Supplementary material for: Functional dynamic genetic effects on gene regulation are specific to particular cell types and environmental conditions
Source: eLife journal article supplement (doi:10.7554/elife.67077), 2021-05-14
Supplement: supp [file elife-67077-supp-v1.zip]

Archive with 19 entries (19 files):
- elife_poa_e67077_Transparent_Reporting_File.docx
- elife_poa_e67077_Figure_1_figure_supplement_1.pdf
- elife_poa_e67077_Figure_1_figure_supplement_2.pdf
- elife_poa_e67077_Figure_1_figure_supplement_3.pdf
- elife_poa_e67077_Figure_1_figure_supplement_4.pdf
- elife_poa_e67077_Figure_1_figure_supplement_5.pdf
- elife_poa_e67077_Figure_1_figure_supplement_6.pdf
- elife_poa_e67077_Figure_1_figure_supplement_7.pdf
- elife_poa_e67077_Figure_1_figure_supplement_8.pdf
- elife_poa_e67077_Figure_2_figure_supplement_1.pdf
- elife_poa_e67077_Figure_2_figure_supplement_2.pdf
- elife_poa_e67077_Figure_3_figure_supplement_1.pdf
- elife_poa_e67077_Figure_3_figure_supplement_2.pdf
- elife_poa_e67077_Figure_3_figure_supplement_3.pdf
- elife_poa_e67077_Figure_4_figure_supplement_1.pdf
- elife_poa_e67077_Figure_4_figure_supplement_2.pdf
- elife_poa_e67077_Figure_5_figure_supplement_1.pdf
- elife_poa_e67077_Figure_5_figure_supplement_2.pdf
- elife_poa_e67077_Supplementary_file_1.tex
