# Supplementary figures and images for: Functional dynamic genetic effects on gene regulation are specific to particular cell types and environmental conditions
Source: eLife journal article supplement (doi:10.7554/elife.67077), 2021-05-14

A

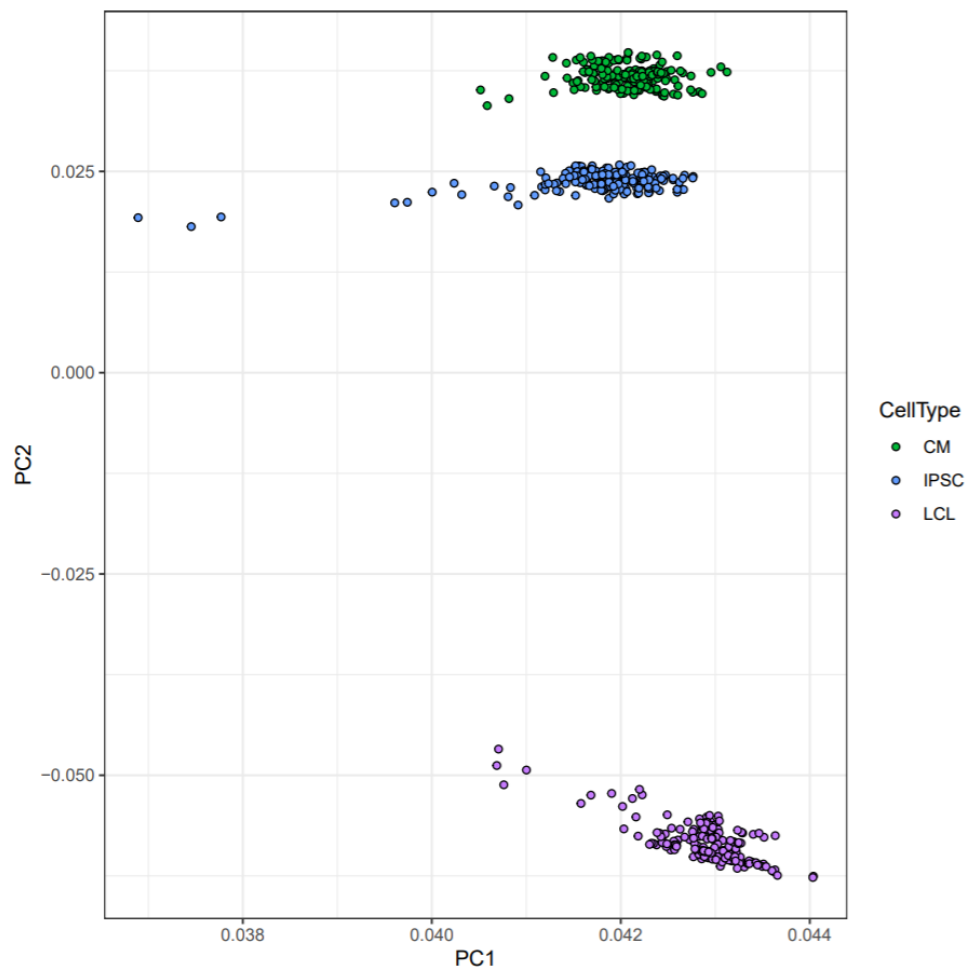

B

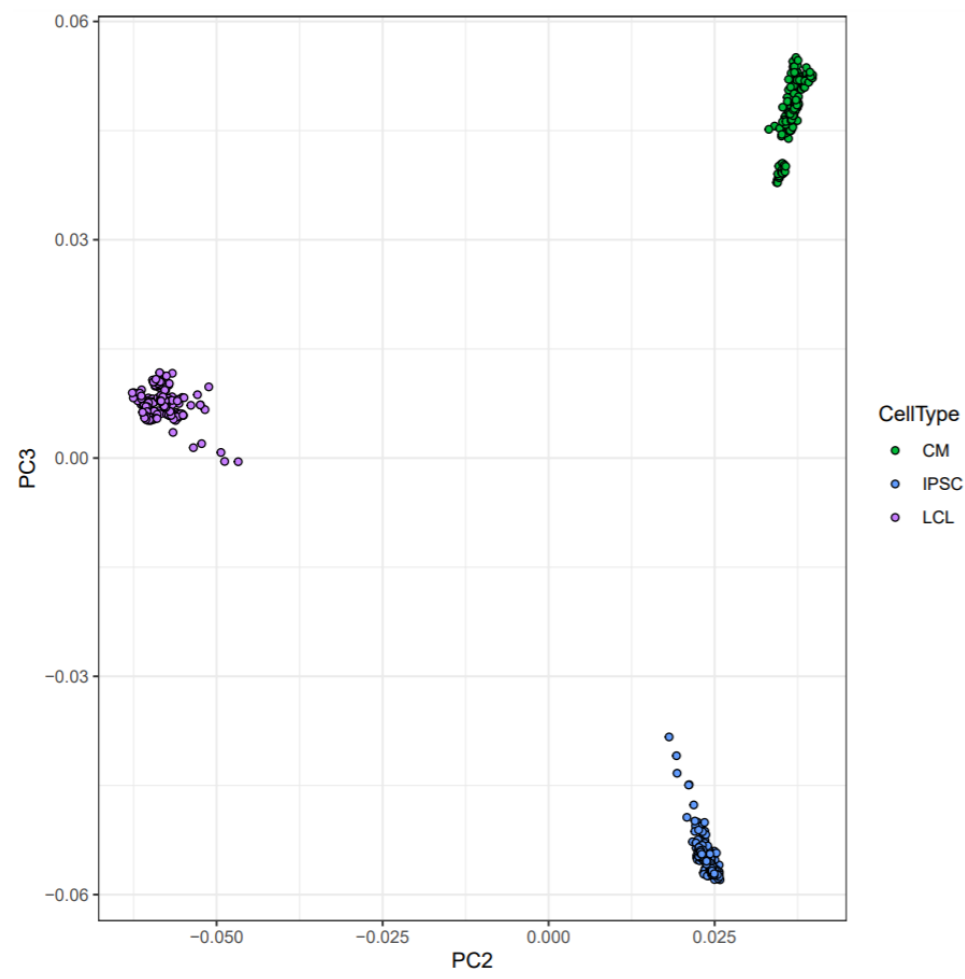

Supplement: supp [file elife-67077-supp-v1.zip › elife_poa_e67077_Figure_1_figure_supplement_1.pdf]

A

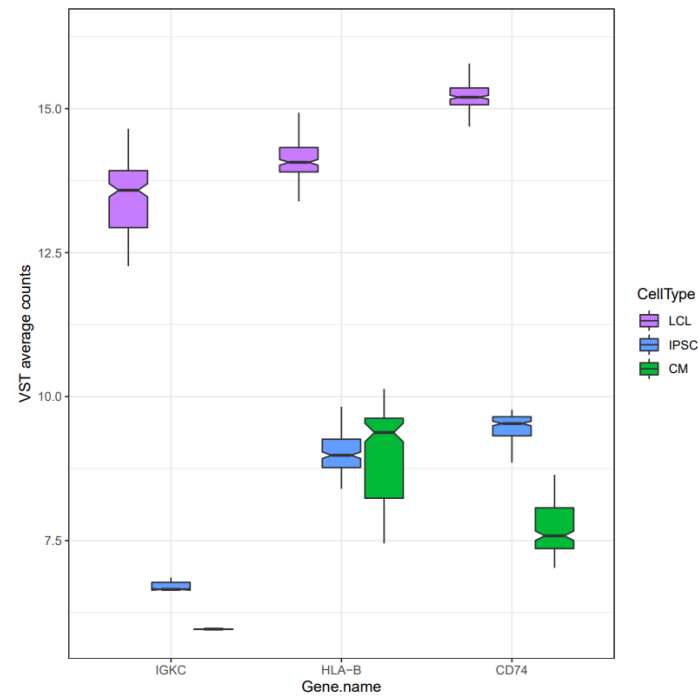

B

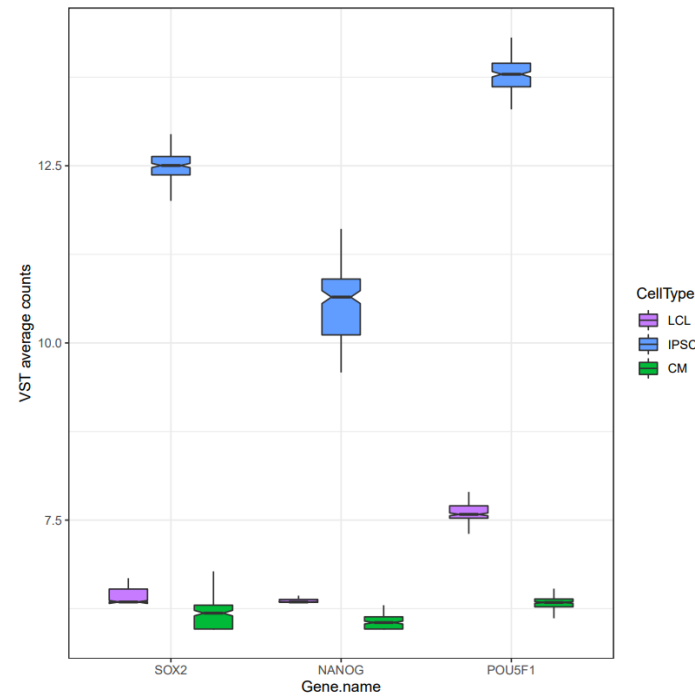

C

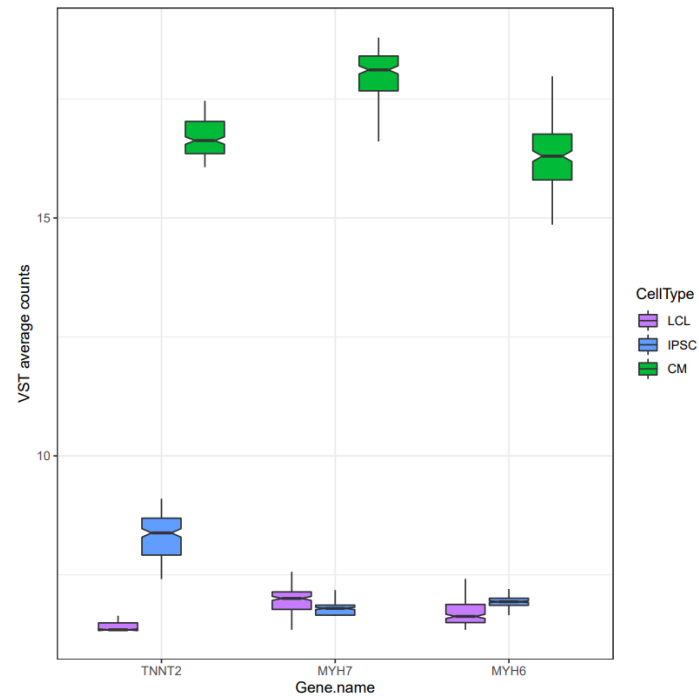

Supplement: supp [file elife-67077-supp-v1.zip › elife_poa_e67077_Figure_1_figure_supplement_2.pdf]

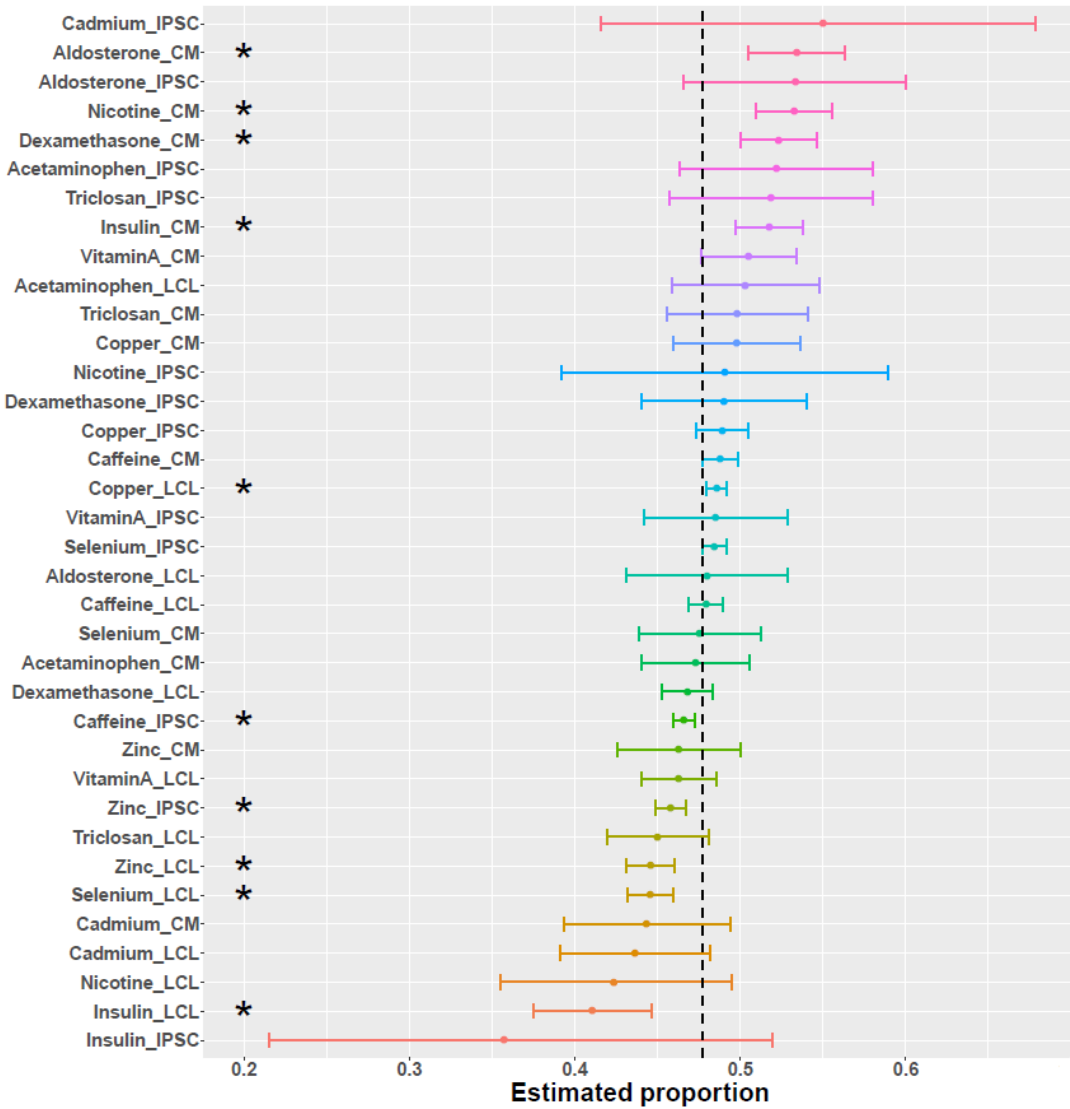

Supplement: supp [file elife-67077-supp-v1.zip › elife_poa_e67077_Figure_1_figure_supplement_3.pdf]

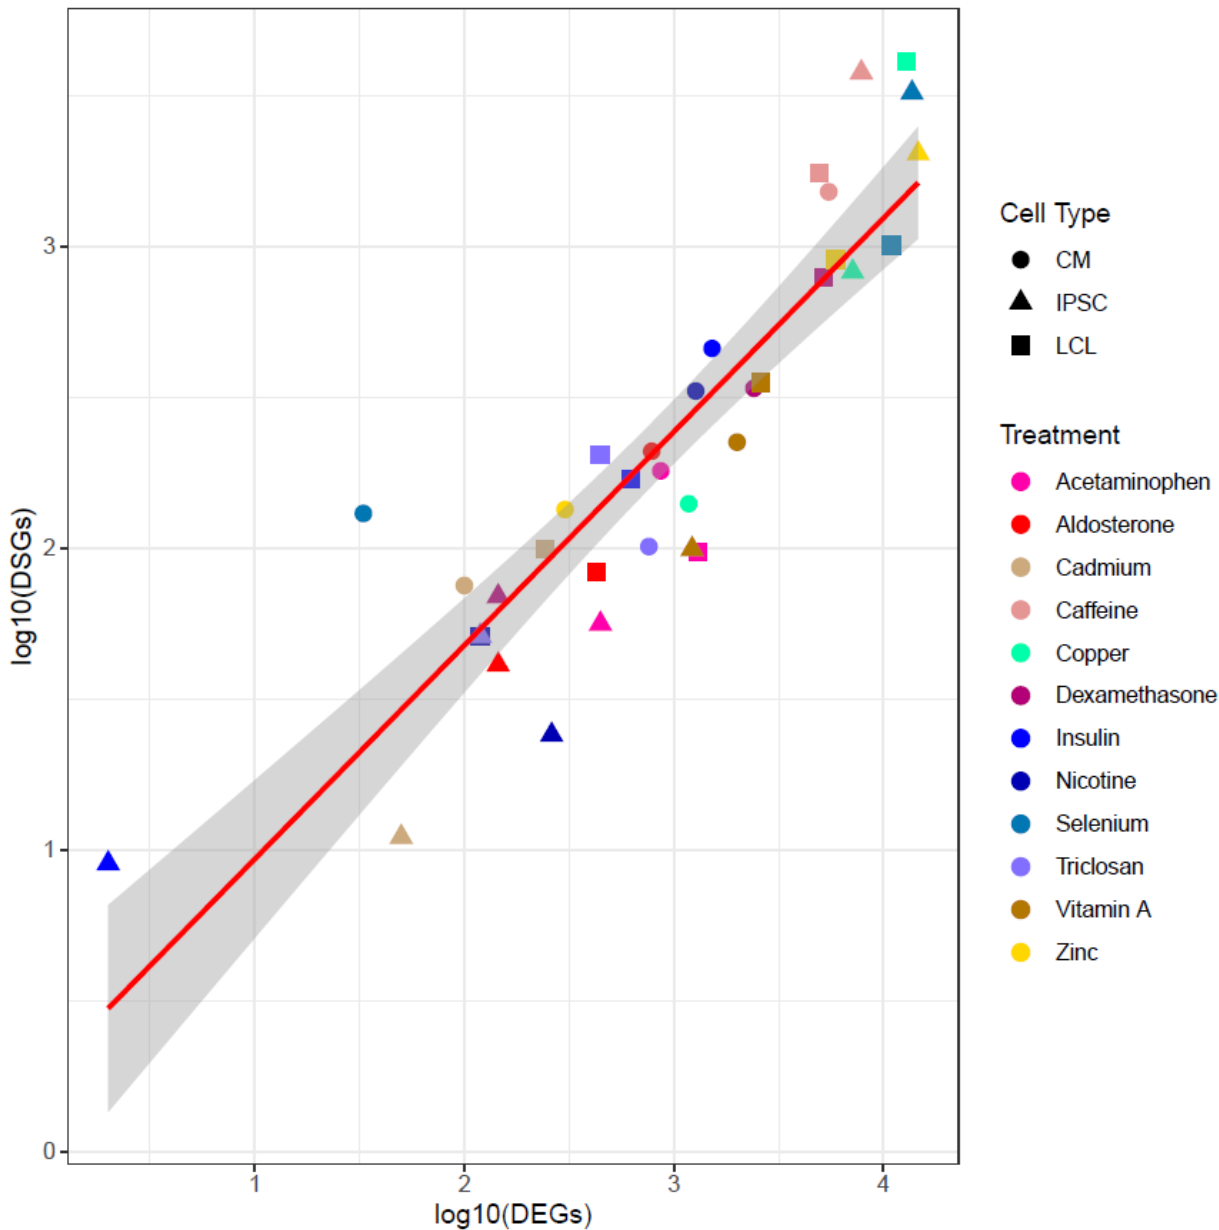

Supplement: supp [file elife-67077-supp-v1.zip › elife_poa_e67077_Figure_1_figure_supplement_4.pdf]

A

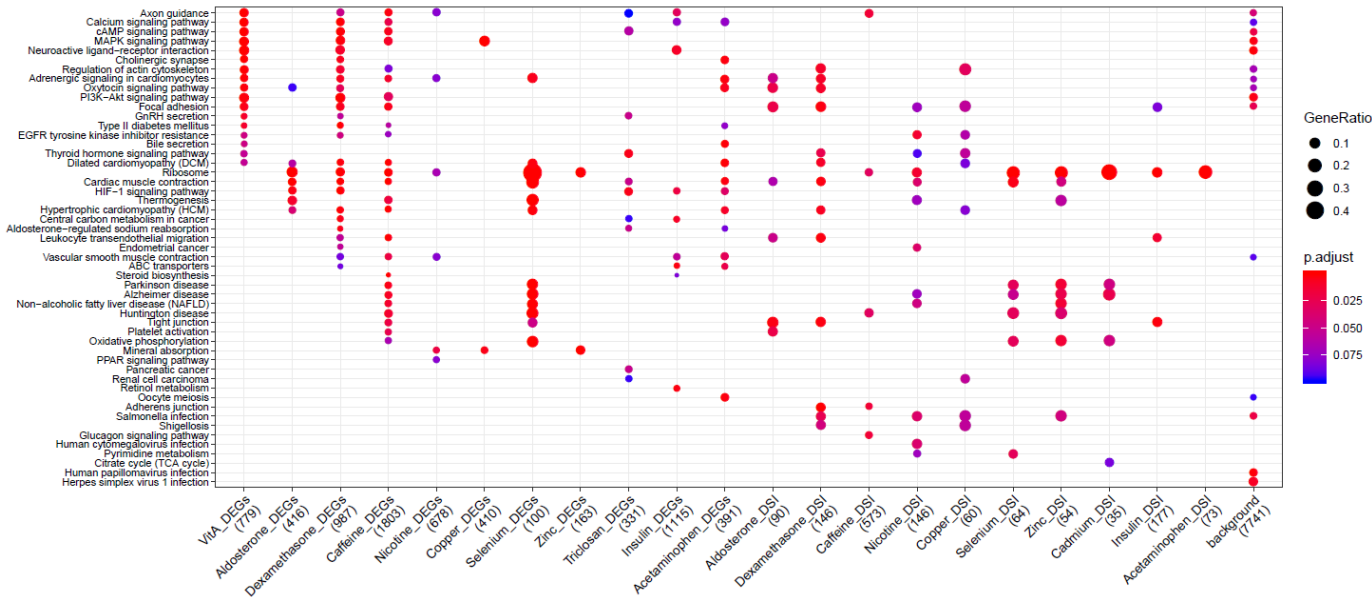

B

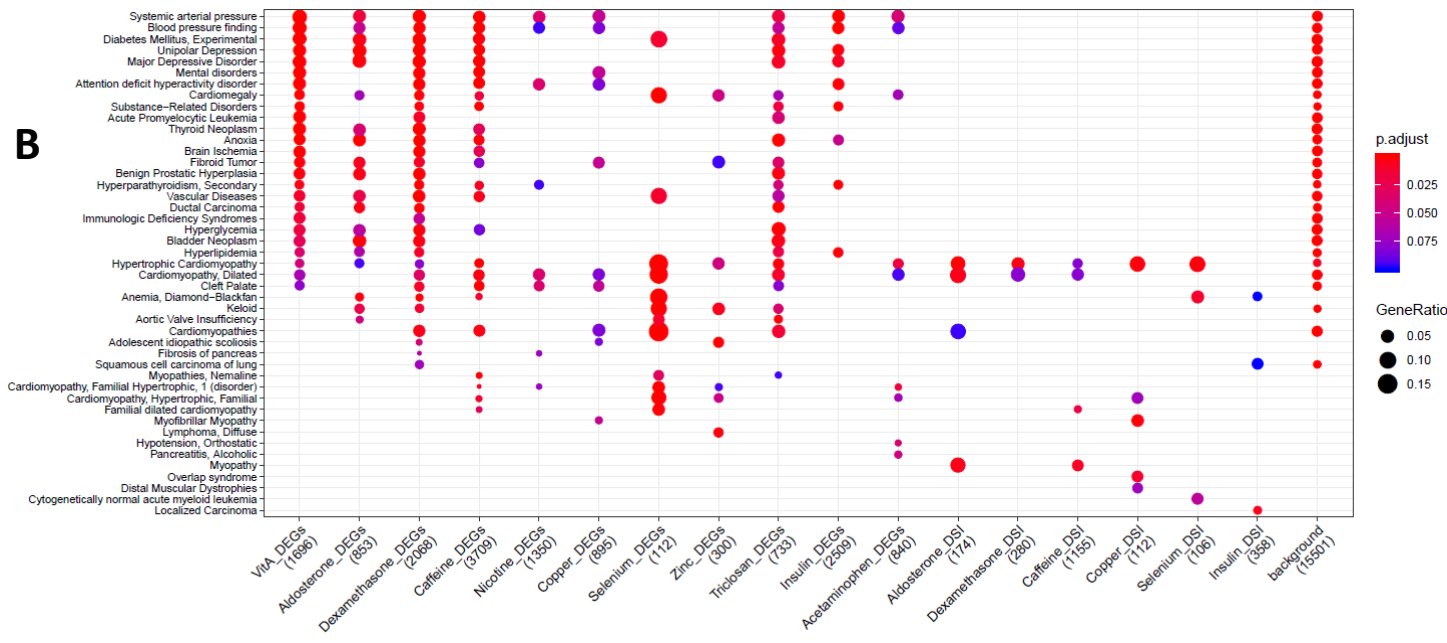

Supplement: supp [file elife-67077-supp-v1.zip › elife_poa_e67077_Figure_1_figure_supplement_5.pdf]

A

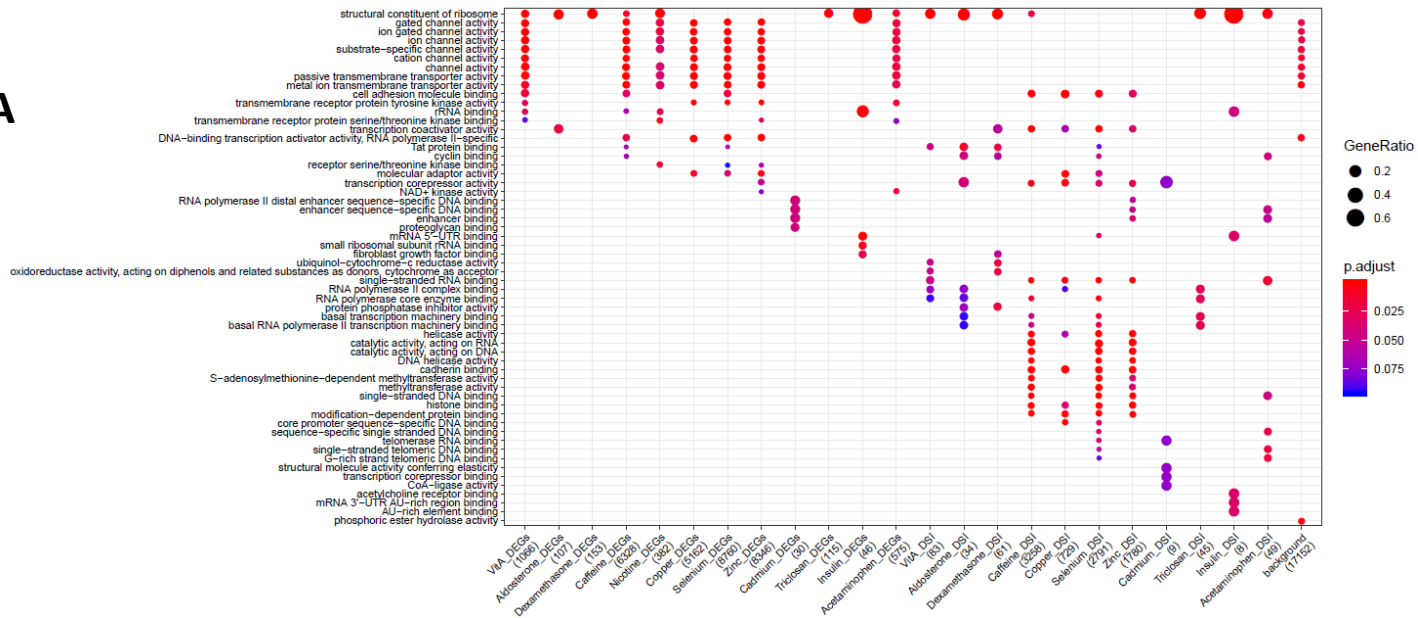

B

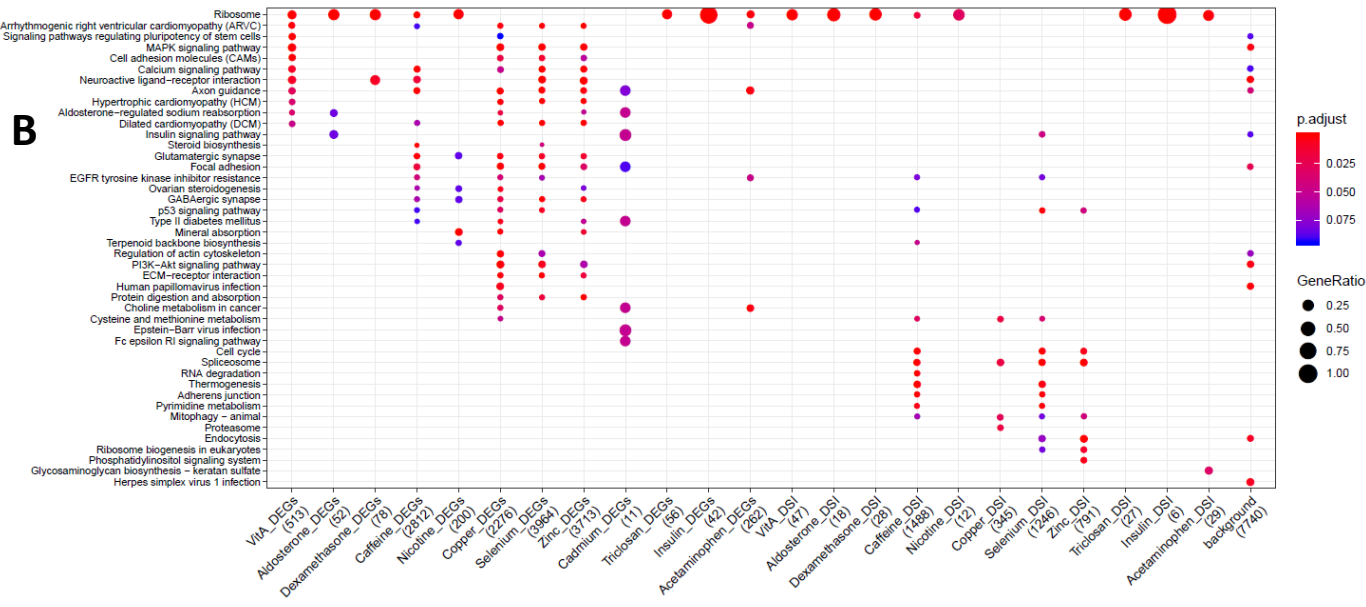

Supplement: supp [file elife-67077-supp-v1.zip › elife_poa_e67077_Figure_1_figure_supplement_6.pdf]

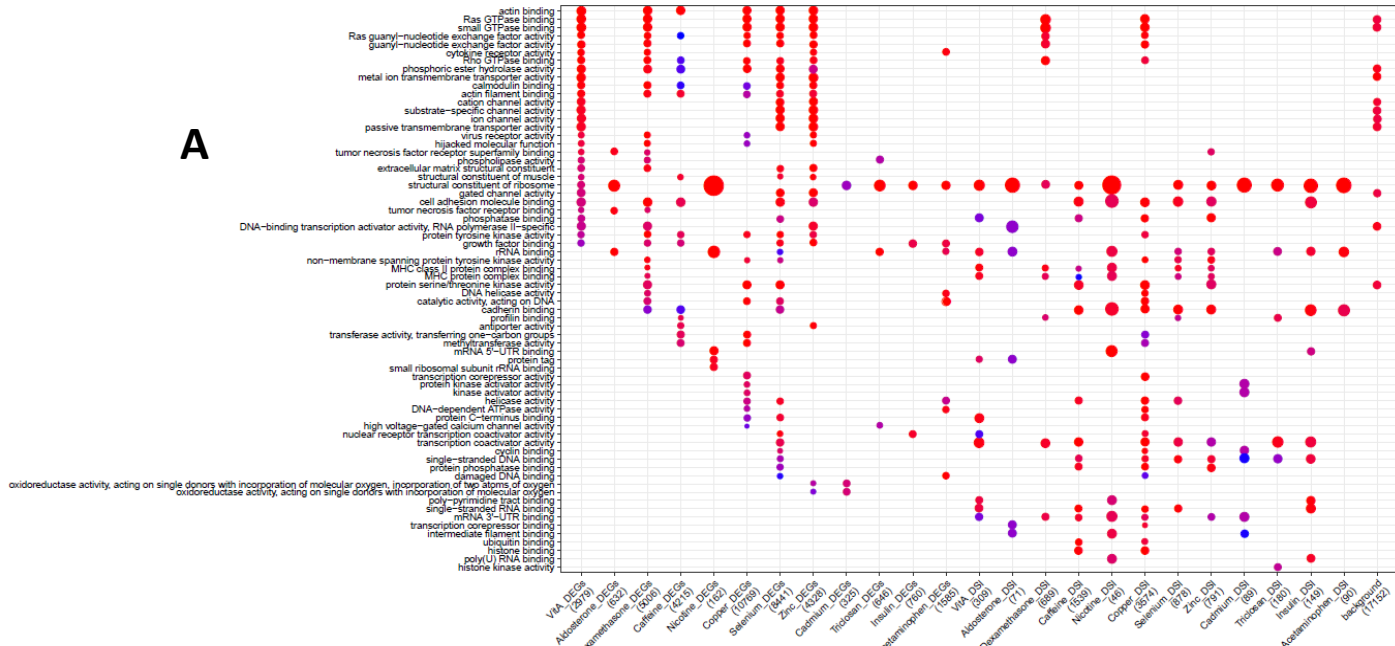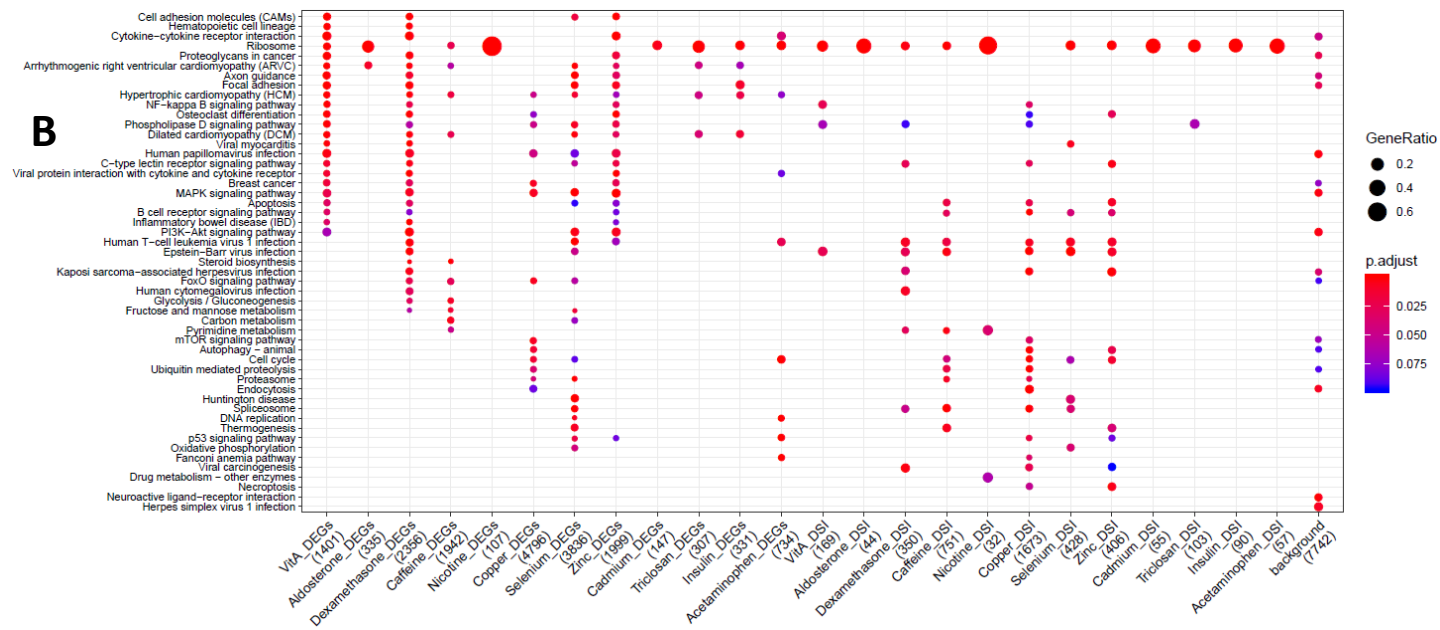

Supplement: supp [file elife-67077-supp-v1.zip › elife_poa_e67077_Figure_1_figure_supplement_7.pdf]

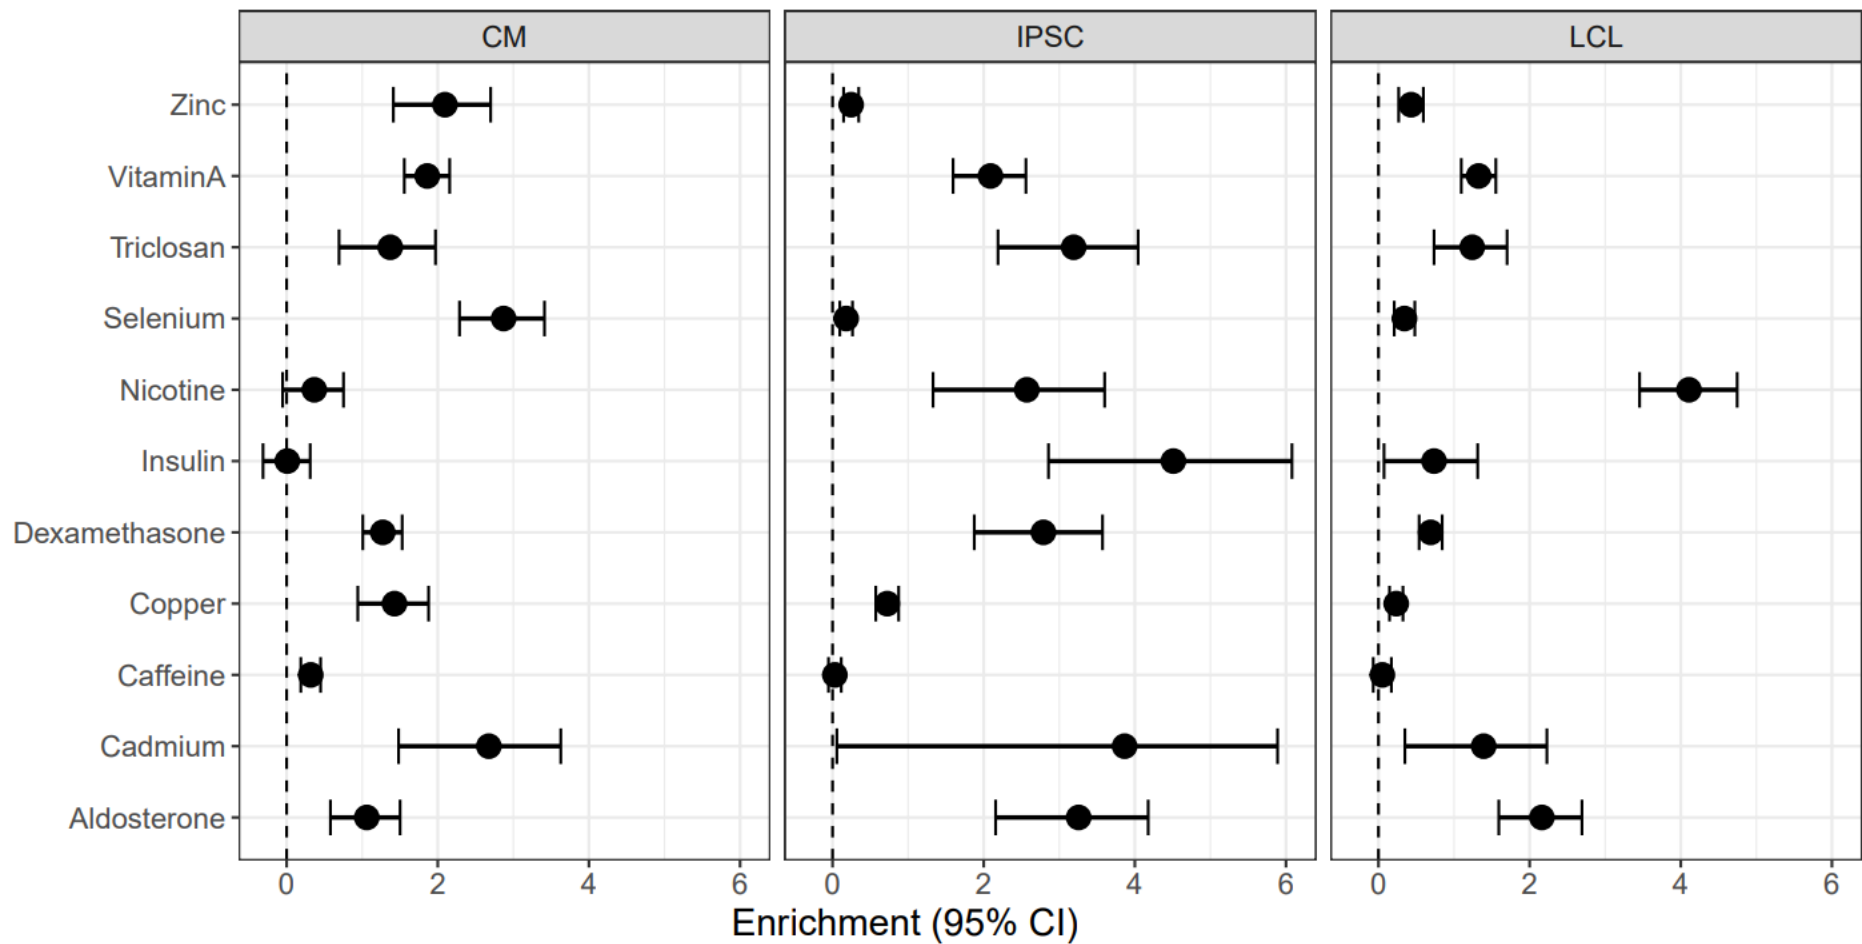

Supplement: supp [file elife-67077-supp-v1.zip › elife_poa_e67077_Figure_1_figure_supplement_8.pdf]

A

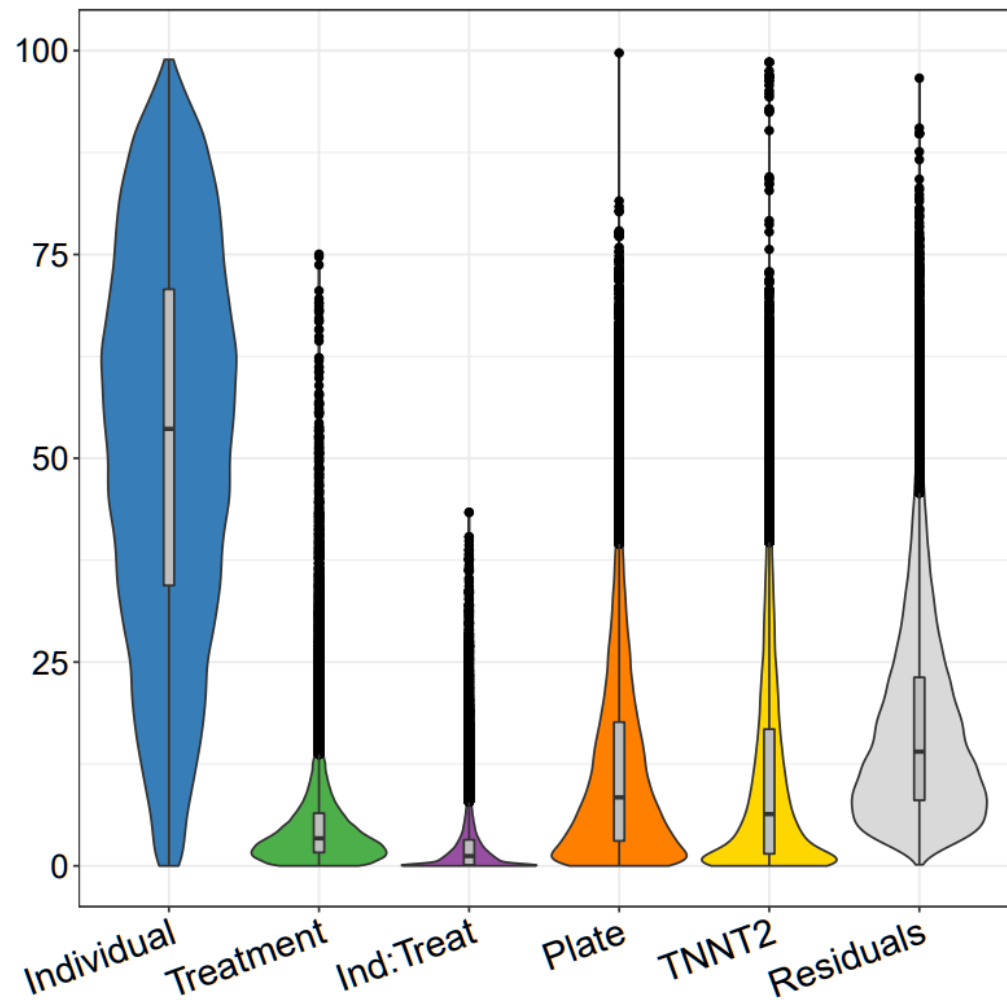

B

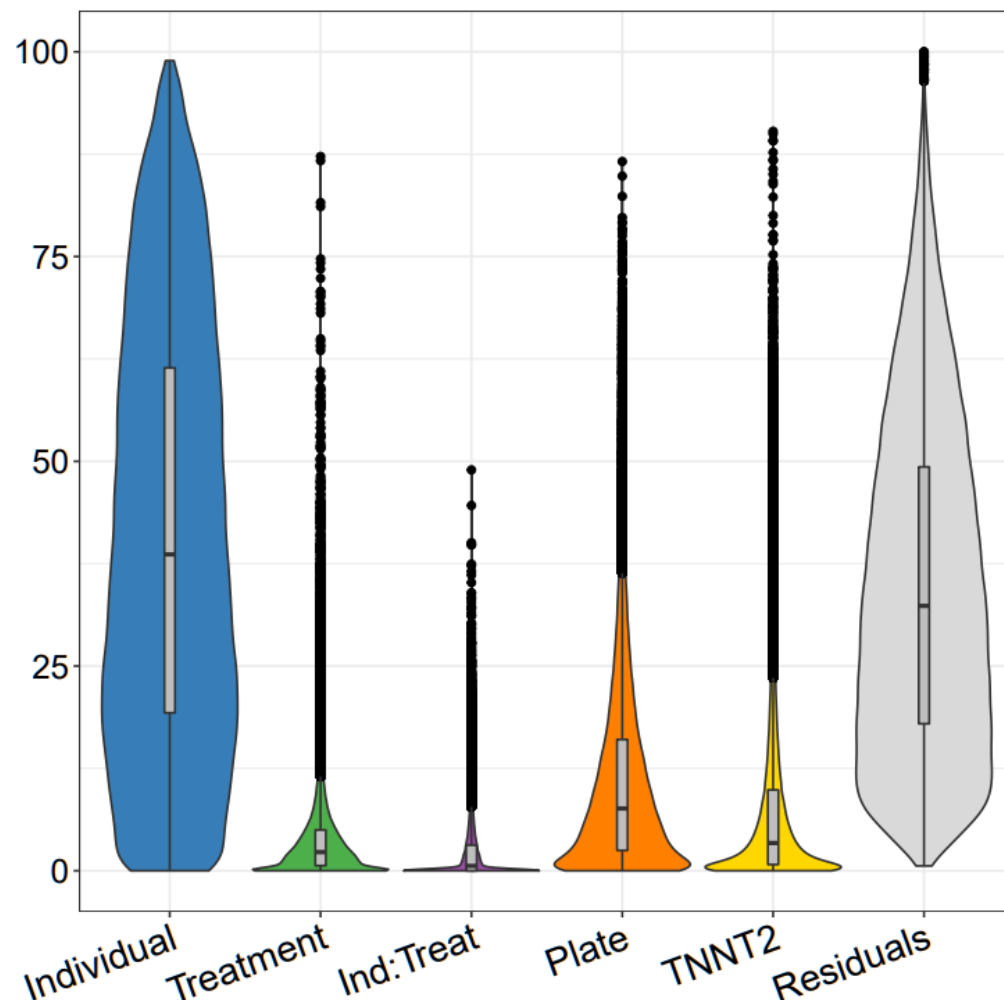

Supplement: supp [file elife-67077-supp-v1.zip › elife_poa_e67077_Figure_2_figure_supplement_1.pdf]

Residual Variance

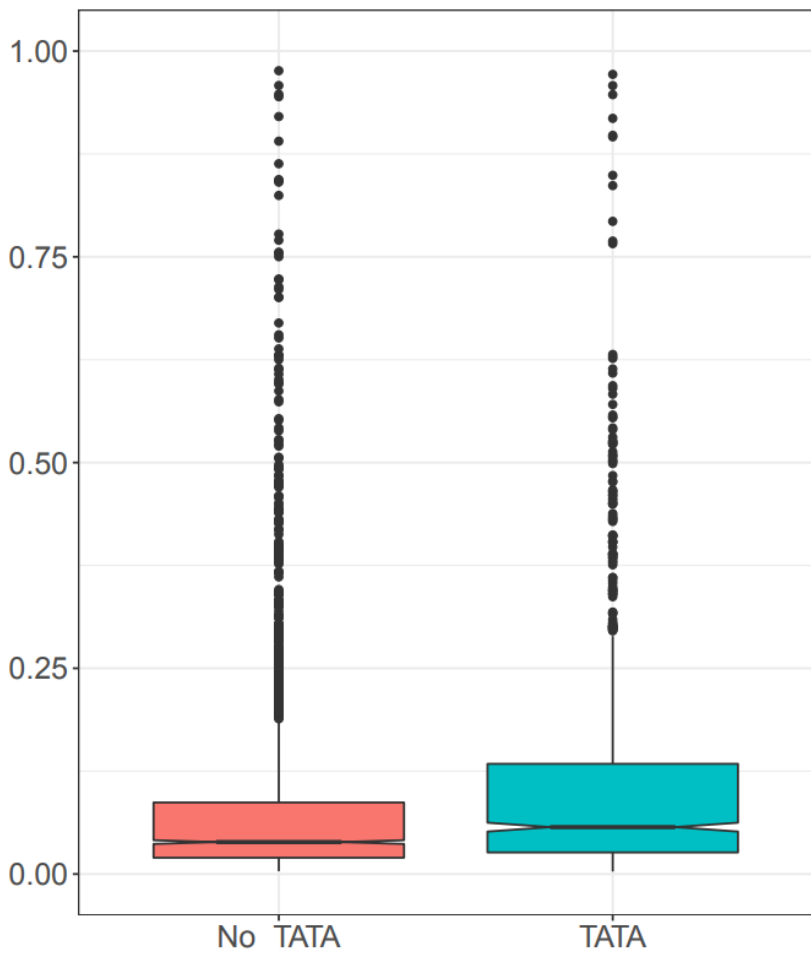

Supplement: supp [file elife-67077-supp-v1.zip › elife_poa_e67077_Figure_2_figure_supplement_2.pdf]

A

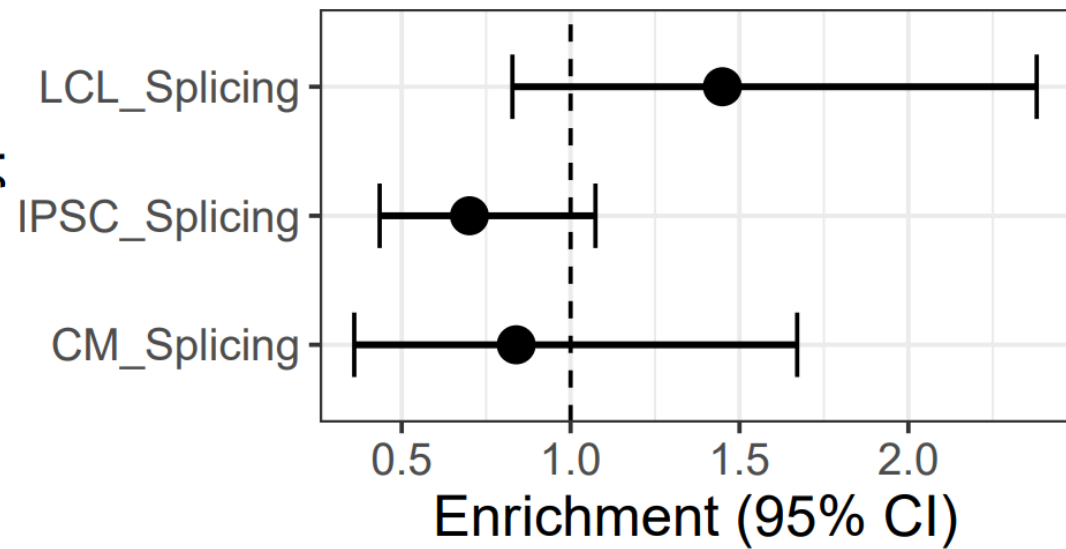

B

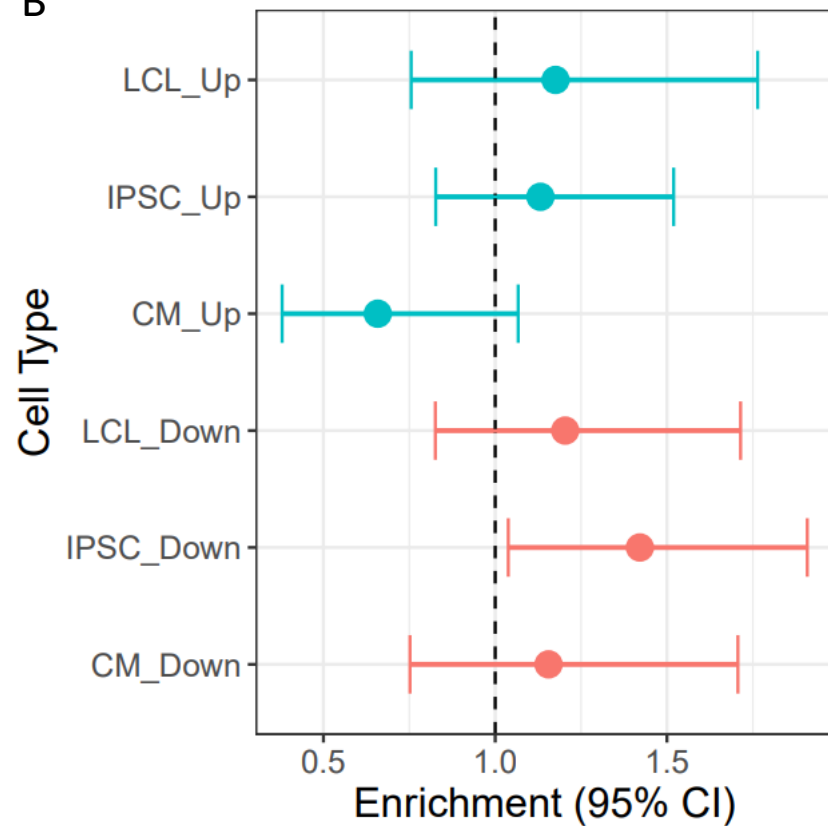

Supplement: supp [file elife-67077-supp-v1.zip › elife_poa_e67077_Figure_3_figure_supplement_1.pdf]

A

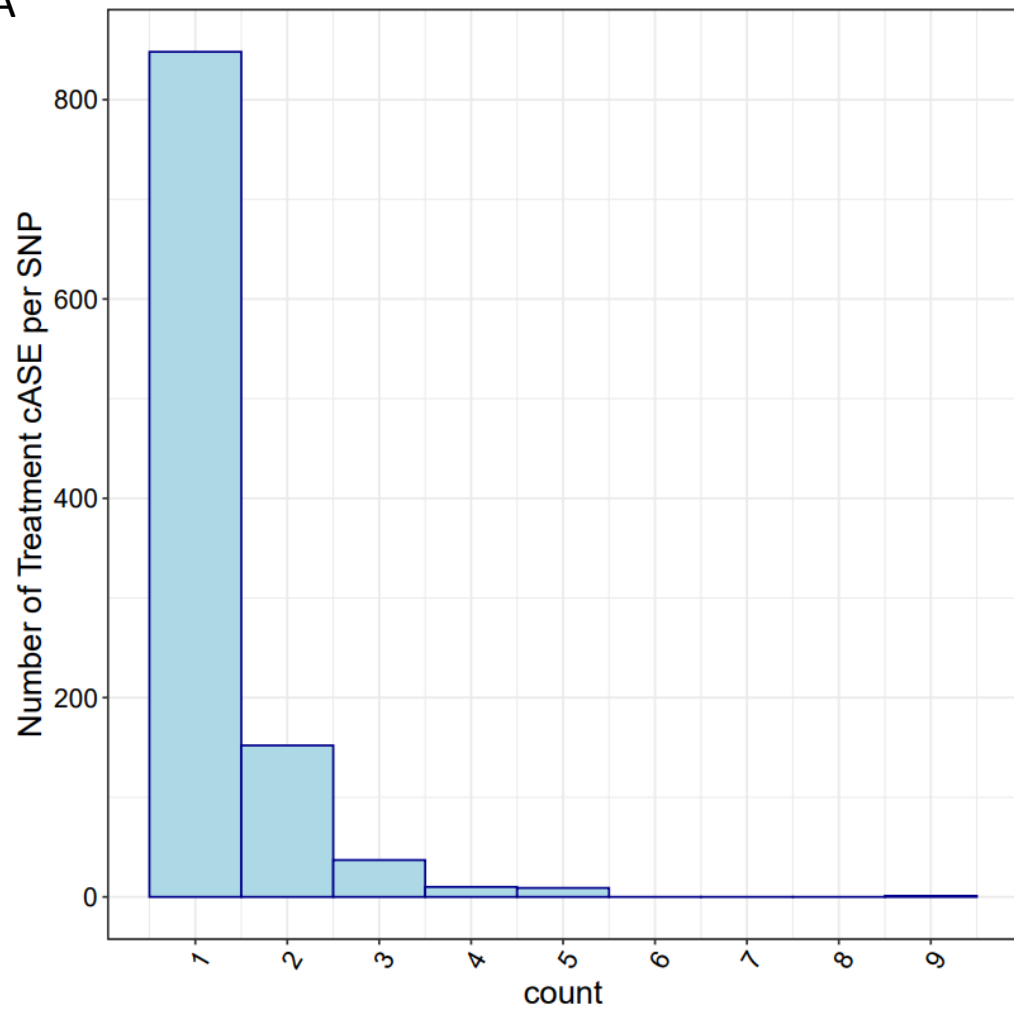

B

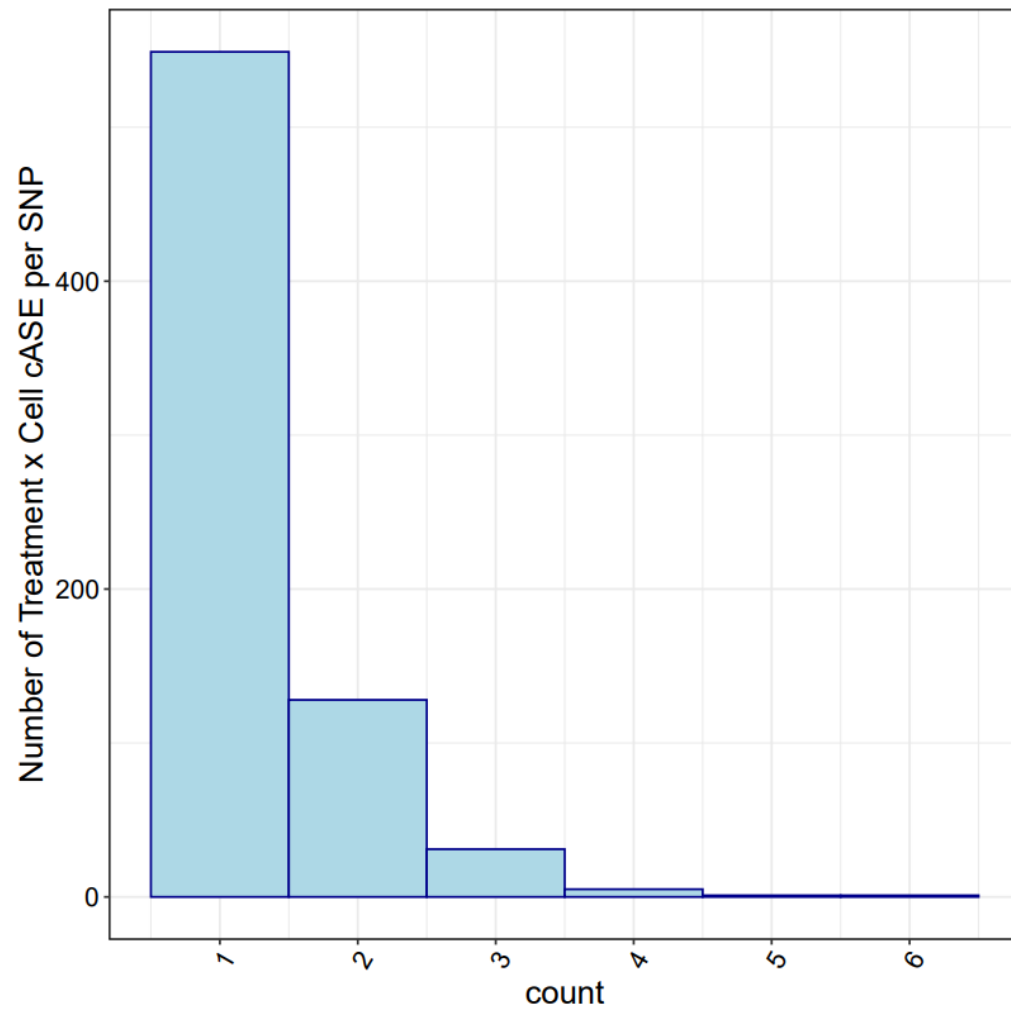

Supplement: supp [file elife-67077-supp-v1.zip › elife_poa_e67077_Figure_3_figure_supplement_2.pdf]

# ASE

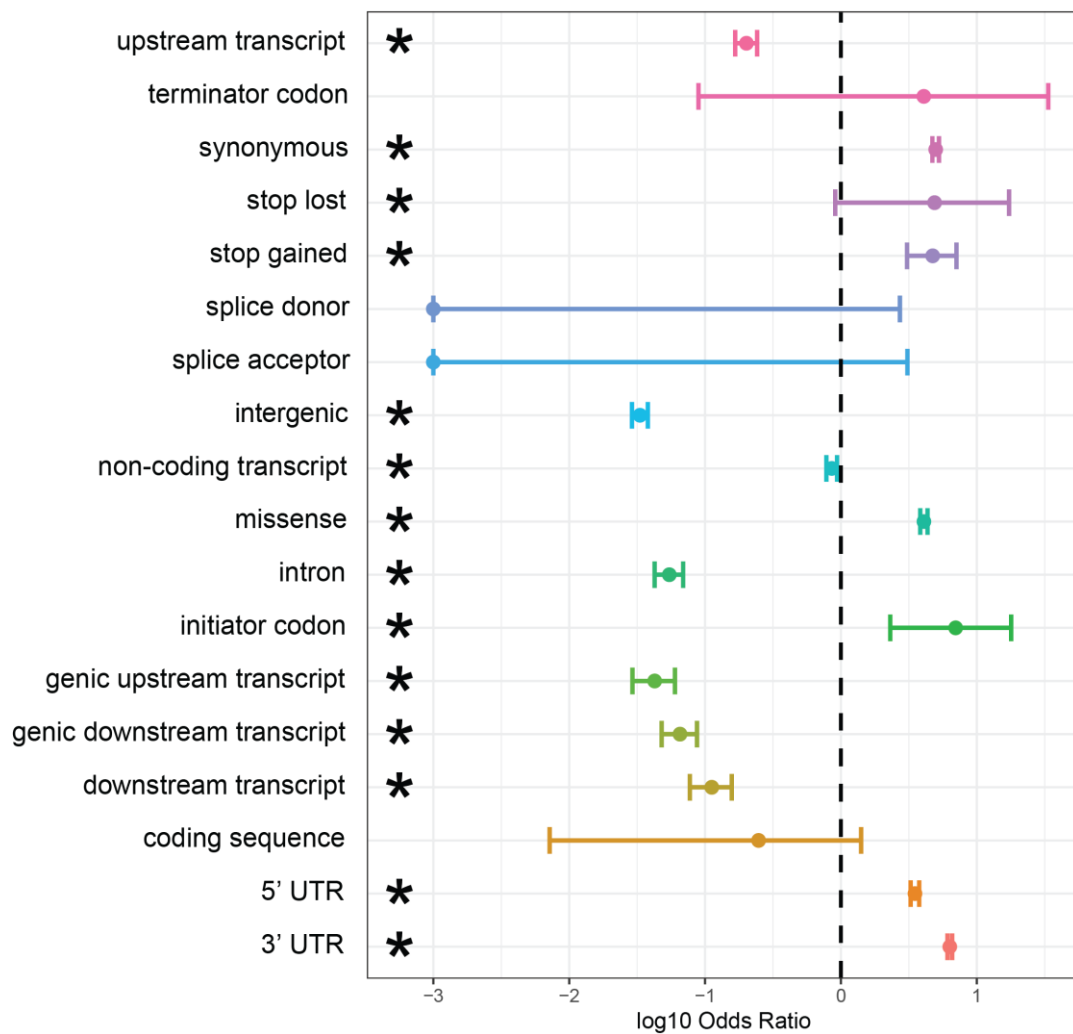

# cASE

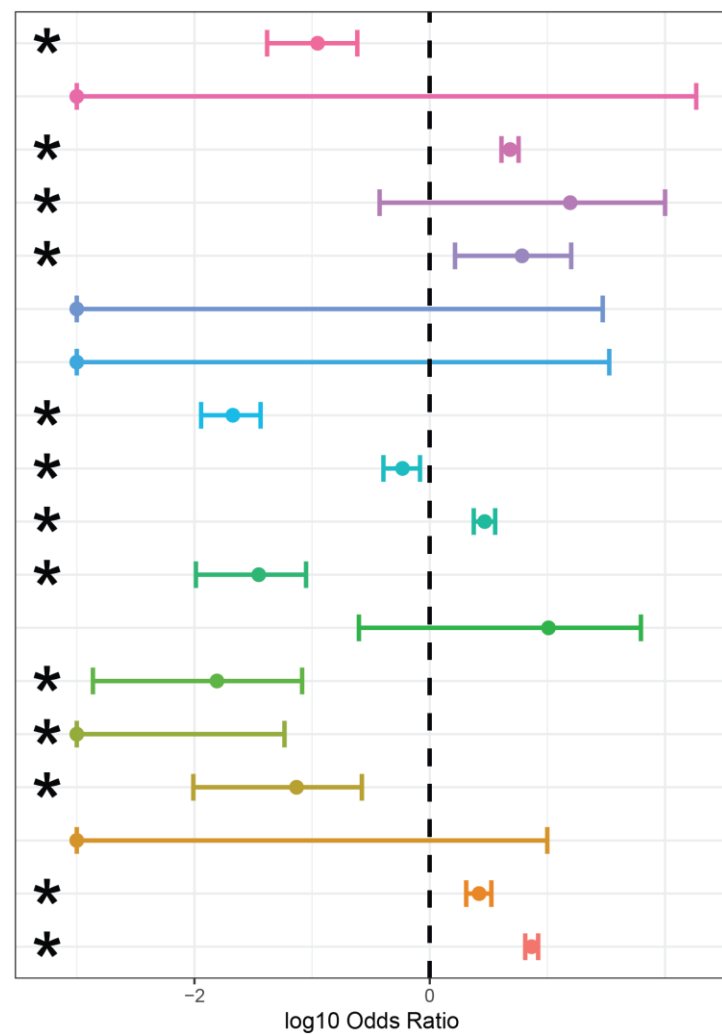

Supplement: supp [file elife-67077-supp-v1.zip › elife_poa_e67077_Figure_3_figure_supplement_3.pdf]

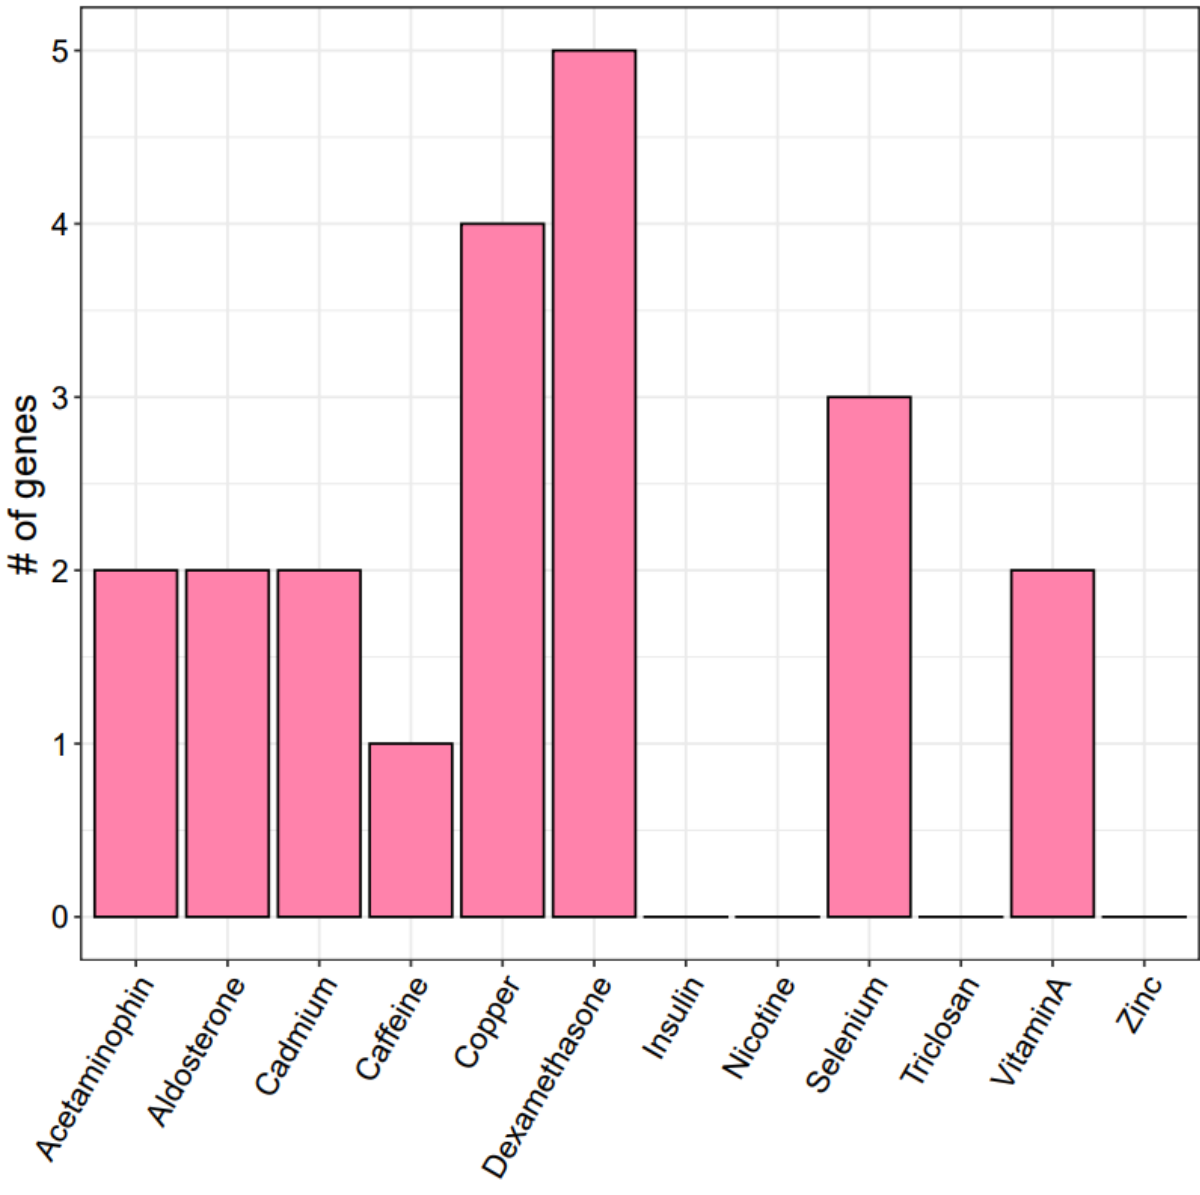

Supplement: supp [file elife-67077-supp-v1.zip › elife_poa_e67077_Figure_4_figure_supplement_2.pdf]

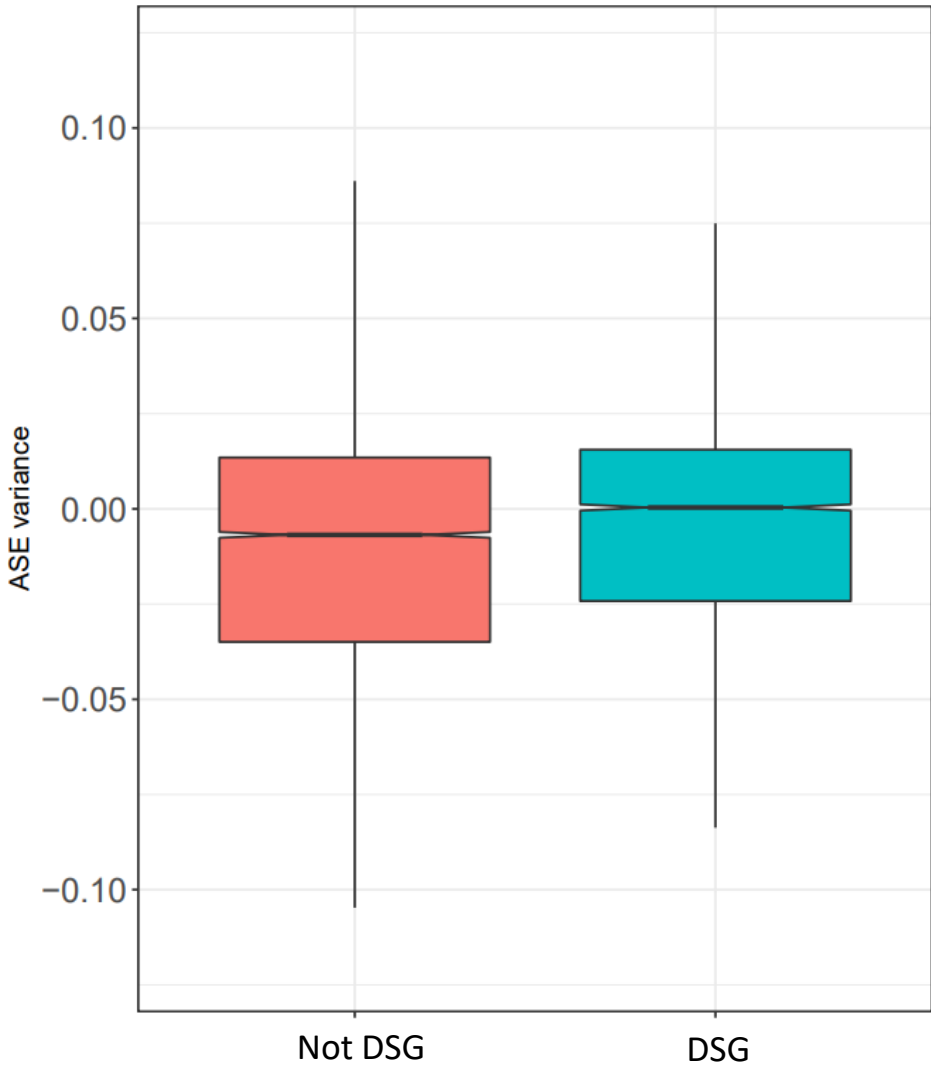

Supplement: supp [file elife-67077-supp-v1.zip › elife_poa_e67077_Figure_5_figure_supplement_1.pdf]

LCL ASE Variance High Vs Low

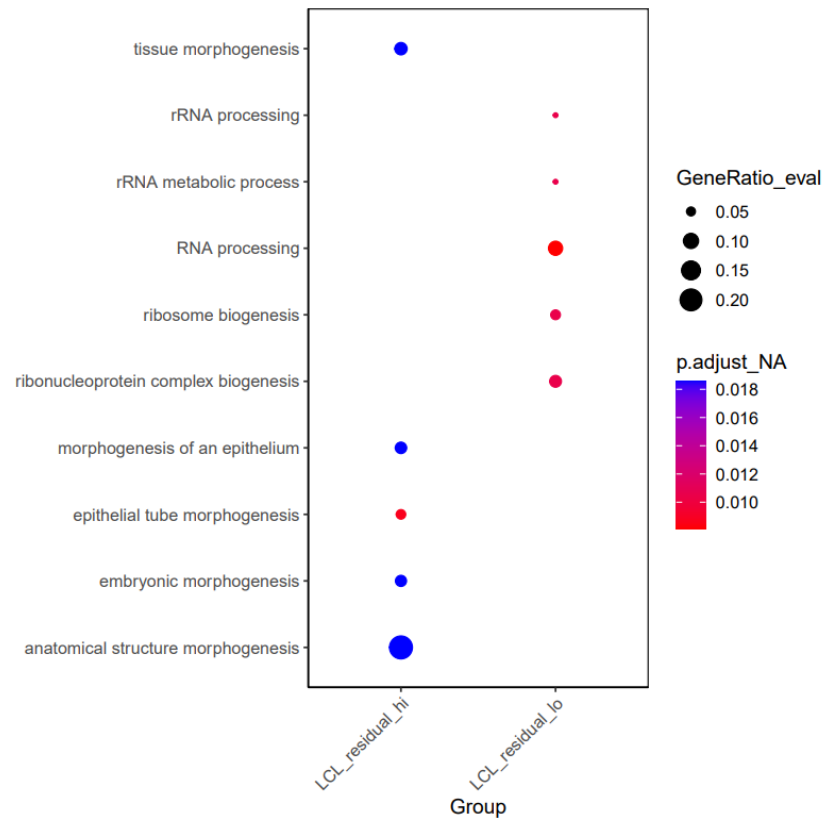

IPSC ASE Variance High Vs Low

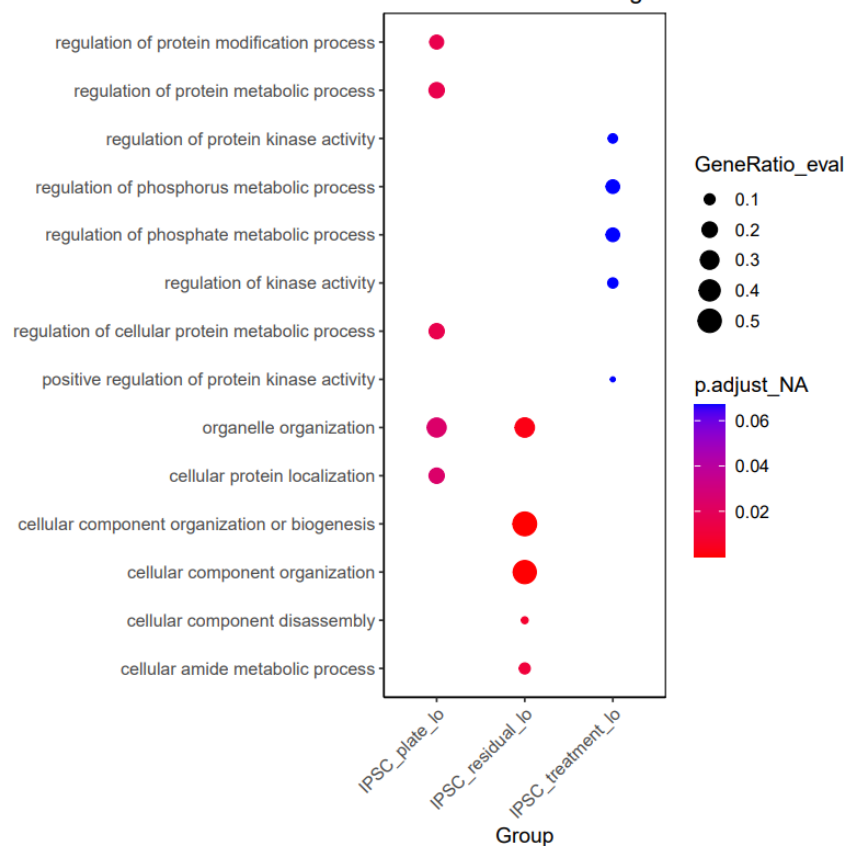

CM ASE Variance High Vs Low

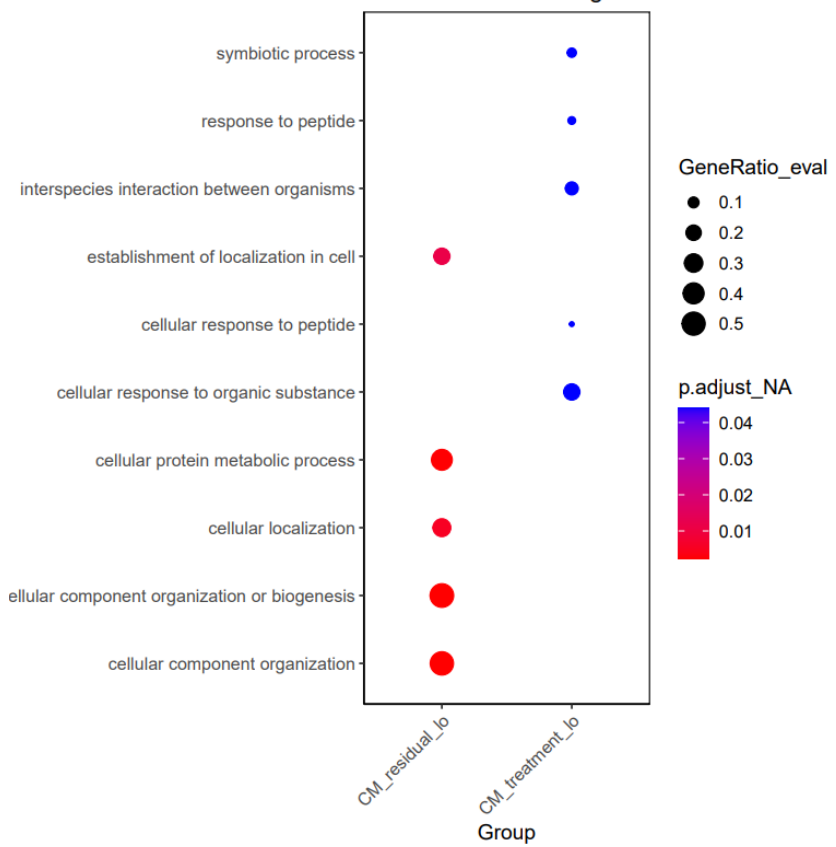

Supplement: supp [file elife-67077-supp-v1.zip › elife_poa_e67077_Figure_5_figure_supplement_2.pdf]
